# Supplementary material for: ssvQC: an integrated CUT&RUN quality control workflow for histone modifications and transcription factors
Source: BMC Res Notes. 2021 Sep 20;14:366. doi: 10.1186/s13104-021-05781-8 (PMC8454122; doi:10.1186/s13104-021-05781-8)
Supplement: Supplementary file 3 — Additional file 3: Table S1. CUT&RUN quality control on fresh versus frozen samples (XLSX 10 KB) [file 13104_2021_5781_MOESM3_ESM.xlsx]

## Sheet: stats_report
Supplementary Table 1: CUT&RUN quality control on fresh versus frozen samples
type	antibody	mapped reads	peak count	FRIP IgG average	FRIP
fresh	H3K4me3	13918966	24830	0.0719544	0.251591
frozen	H3K4me3	10643016	17458	0.0577869	0.283422
fresh	Ikaros	9801770	10809	0.0740703	0.135123
frozen	Ikaros	6039644	22022	0.0586852	0.161382
fresh	IgG	22801016
frozen	IgG	18814172
